# Supplementary material
Source: PubMed Central journal article supplement (PMC5407952)

Supplemental Figure 1. Multivariable adjusted relationship between three month averaged PM<sub>2.5</sub> ( $\mu\text{g}/\text{m}^3$ ) and HDL-P ( $\mu\text{mol}/\text{L}$ ) in the Multi-Ethnic Study of Atherosclerosis (MESA)

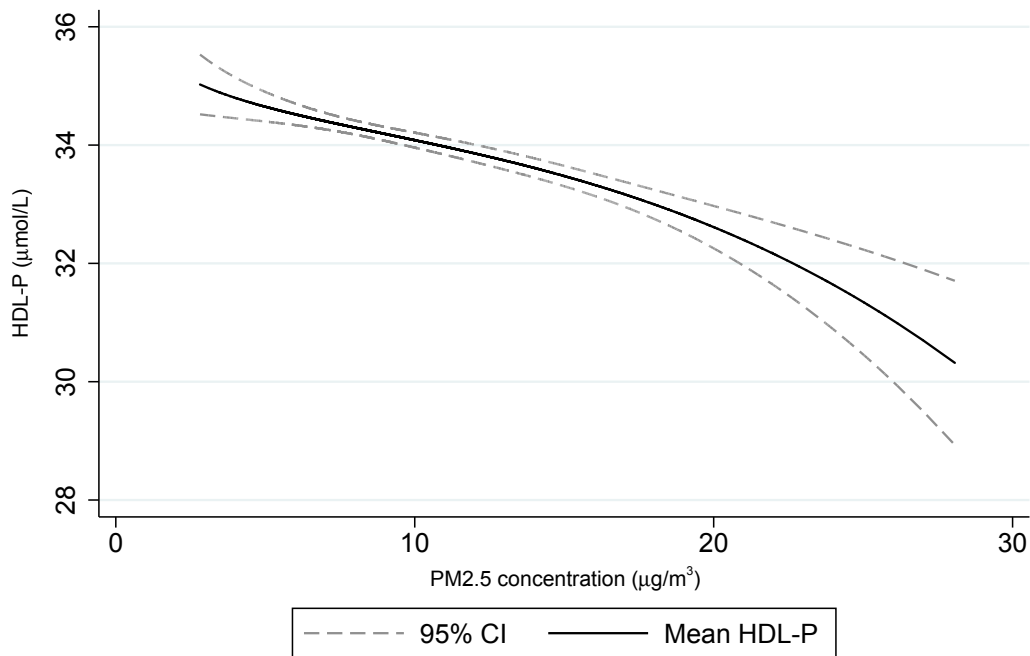

Supplement: NIHMS853478-supplement-Graphic_Abstract.pdf [file NIHMS853478-supplement-Graphic_Abstract.pdf]
